# Supplementary material for: Separation and Removal of Radionuclide Cesium from Water by Biodegradable Magnetic Prussian Blue Nanospheres
Source: MDPI journal article supplement (doi:10.3390/pr10122492), 2022-11-23
Supplement: s1 [file s1]

Article

# Separation and Removal of Radionuclide Cesium from Water by Biodegradable Magnetic Prussian Blue Nanospheres

Shanshan Feng <sup>1,2,3,\*</sup>, Jie Ni <sup>1</sup>, Xun Cao <sup>1</sup>, Jingshuai Gao <sup>1</sup>, Lu Yang <sup>1</sup>, Wenhao Jia <sup>1</sup>, Feng Chen <sup>1</sup>, Sheng Feng <sup>1</sup>, Yao Zhang <sup>1,\*</sup> and Fang Ma <sup>3,4,\*</sup>

**Table S1.** Parameters obtained from different isotherm models for MPBNs.

| Adsorption model | Parameter                                                | Equation                                   | Determination coefficient |
|------------------|----------------------------------------------------------|--------------------------------------------|---------------------------|
| Langmuir model   | $Q_m(\text{mg/g}) = 17.0271$<br>$b(\text{L/g}) = 0.5854$ | $1/Q_e = 0.10032/C_e + 0.05873$            | 0.9750                    |
| Freundlich model | $K(\text{mg/g}) = 5.2485$<br>$1/n = 0.7085$              | $\ln Q_e = 0.70854$<br>$\ln C_e + 1.65794$ | 0.9791                    |
| Temkin model     | $A = 2.2412$<br>$B(\text{L/g}) = 8.4292$                 | $Q_e = 8.42922$<br>$\ln C_e + 6.80233$     | 0.9205                    |

**Table S2.** Parameters of the Cs<sup>+</sup> dimensionless separation factor ( $R_L$ ) of the MPBNs.

| $C_0(\text{mg/L})$ | 5      | 10     | 20     | 30     | 40     | 50     | 60     |
|--------------------|--------|--------|--------|--------|--------|--------|--------|
| $R_L$              | 0.4059 | 0.2546 | 0.1459 | 0.0787 | 0.0041 | 0.0209 | 0.0168 |
